# Supplementary material
Source: publisher site journal article supplement (https://www.spandidos-publications.com/3722/downloadSupplementary)
Supplement: Supplementary file 1 [file downloadSupplementary]

## Sheet: prediction
Table SI. Potential target miRNAs of lncRNA GAS5 identified.
lncRNAbase	DIANA	NPInter
hsa-miR-137	hsa-miR-103a-2-5p	hsa-miR-3175
hsa-miR-4735-3p	hsa-miR-136-3p	hsa-miR-3609
hsa-miR-135b-5p	hsa-miR-148a-3p	hsa-mir-3658-5p
hsa-miR-29c-3p	hsa-miR-192-5p	hsa-miR-4452
hsa-miR-29b-3p	hsa-miR-19a-5p	hsa-miR-4686
hsa-miR-205-5p	hsa-miR-200c-3p	hsa-miR-6072
hsa-miR-3167	hsa-miR-27b-5p	hsa-miR-18a-5p
hsa-miR-196a-5p	hsa-miR-32-5p	hsa-miR-18b-5p
hsa-miR-26a-5p	hsa-miR-362-5p	hsa-miR-524-5p
hsa-miR-135a-5p	hsa-miR-374c-3p	hsa-miR-548a-3p
hsa-miR-1297	hsa-miR-452-3p	hsa-mir-93-3p
hsa-miR-18a-5p	hsa-miR-484	hsa-miR-30b-3p
hsa-miR-433-3p	hsa-miR-542-3p	hsa-miR-377-3p
hsa-miR-136-5p	hsa-miR-576-5p	hsa-miR-335-3p
hsa-miR-544a	hsa-miR-582-5p	hsa-miR-548g-3p
hsa-miR-485-5p	hsa-miR-628-5p	hsa-miR-548o-3p
hsa-miR-23a-3p	hsa-miR-642a-5p	hsa-mir-103a-2-5p
hsa-miR-128-3p	hsa-miR-876-5p	hsa-miR-449b-3p
hsa-miR-26b-5p	hsa-miR-92b-3p	hsa-miR-3116
hsa-miR-4465	hsa-miR-10b-3p	hsa-miR-3613-3p
hsa-miR-196b-5p	hsa-miR-181c-5p	hsa-miR-4715-3p
hsa-miR-590-3p	hsa-miR-190b	hsa-miR-4786-3p
hsa-miR-29a-3p	hsa-miR-224-3p	hsa-miR-1273g-3p
hsa-miR-876-5p	hsa-miR-3065-3p	hsa-miR-3606-3p
hsa-miR-873-5p	hsa-miR-30e-3p	hsa-mir-3192
hsa-miR-23b-3p	hsa-miR-3157-5p	hsa-miR-106a-3p
hsa-miR-455-5p	hsa-miR-320a	hsa-let-7a-2
hsa-miR-23c	hsa-miR-335-3p	hsa-let-7b-5p
hsa-miR-221-3p	hsa-miR-373-5p	hsa-let-7c
hsa-miR-222-3p	hsa-miR-449a	hsa-let-7d-3p
hsa-miR-223-3p	hsa-miR-4698	hsa-let-7e-3p
hsa-miR-374b-5p	hsa-miR-512-5p	hsa-let-7f-5p
hsa-miR-374a-5p	hsa-miR-576-3p	hsa-let-7g-5p
hsa-miR-361-5p	hsa-miR-590-5p	hsa-let-7i-5p
hsa-miR-18b-5p	hsa-miR-631	hsa-mir-10a-3p
	hsa-miR-652-3p	hsa-mir-10b-3p
	hsa-miR-96-5p	hsa-mir-122
	hsa-miR-101-5p	hsa-miR-1251
	hsa-miR-1179	hsa-mir-128
	hsa-miR-135b-5p	hsa-miR-1306-3p
	hsa-miR-181c-3p	hsa-mir-130a-3p
	hsa-miR-27a-3p	hsa-miR-130b-3p
	hsa-miR-27b-3p	hsa-miR-135a2
	hsa-miR-30a-3p	hsa-miR-135b-5p
	hsa-miR-34a-3p	hsa-miR-136-3p
	hsa-miR-367-3p	hsa-mir-1
	hsa-miR-371a-5p	hsa-mir-140-3p
	hsa-miR-378a-5p	hsa-miR-145-3p
	hsa-miR-382-3p	hsa-miR-147b
	hsa-miR-4511	hsa-mir-150
	hsa-miR-545-3p	hsa-mir-186-3p
	hsa-miR-5682	hsa-mir-194-2
	hsa-miR-577	hsa-mir-196a-2
	hsa-miR-92a-1-5p	hsa-miR-196b-3p
	hsa-miR-93-3p	hsa-miR-200a-5p
	hsa-miR-1271-5p	hsa-miR-205-5p
	hsa-miR-1307-3p	hsa-mir-216a-3p
	hsa-miR-144-5p	hsa-miR-217
	hsa-miR-152-3p	hsa-miR-221-3p
	hsa-miR-181a-3p	hsa-mir-222
	hsa-miR-200b-3p	hsa-miR-23a-3p
	hsa-miR-23b-5p	hsa-mir-23b-3p
	hsa-miR-30c-2-3p	hsa-miR-23c
	hsa-miR-338-5p	hsa-mir-25-3p
	hsa-miR-378i	hsa-miR-29a-5p
	hsa-miR-452-5p	hsa-mir-29b-2-5p
	hsa-miR-455-5p	hsa-mir-29c
	hsa-miR-4793-3p	hsa-mir-301a-3p
	hsa-miR-499a-5p	hsa-miR-301b
	hsa-miR-501-5p	hsa-mir-30c-1
	hsa-miR-616-5p	hsa-mir-31-5p
	hsa-miR-769-3p	hsa-miR-3167
	hsa-miR-876-3p	hsa-mir-320a
	hsa-miR-1224-3p	hsa-miR-320b
	hsa-miR-139-5p	hsa-miR-320c
	hsa-miR-148b-3p	hsa-miR-320d
	hsa-miR-15a-3p	hsa-miR-329-3p
	hsa-miR-23b-3p	hsa-miR-339-5p
	hsa-miR-24-3p	hsa-miR-340-5p
	hsa-miR-323a-5p	hsa-mir-342-3p
	hsa-miR-34b-5p	hsa-miR-346
	hsa-miR-3619-5p	hsa-mir-34c-5p
	hsa-miR-485-5p	hsa-miR-361-3p
	hsa-miR-509-5p	hsa-miR-3666
	hsa-miR-548ar-3p	hsa-mir-367-3p
	hsa-miR-654-5p	hsa-miR-3681-3p
	hsa-miR-769-5p	hsa-miR-369-3p
	hsa-miR-935	hsa-miR-370
	hsa-miR-1207-5p	hsa-mir-374a-3p
	hsa-miR-1-3p	hsa-miR-374b-3p
	hsa-miR-181a-2-3p	hsa-miR-378c
	hsa-miR-182-5p	hsa-miR-378f
	hsa-miR-19b-1-5p	hsa-miR-382-5p
	hsa-miR-23a-3p	hsa-miR-425-5p
	hsa-miR-26a-5p	hsa-miR-4295
	hsa-miR-28-5p	hsa-miR-433
	hsa-miR-30c-1-3p	hsa-miR-4429
	hsa-miR-30d-3p	hsa-miR-4458
	hsa-miR-3174	hsa-mir-448
	hsa-miR-3689a-5p	hsa-miR-4500
	hsa-miR-5094	hsa-miR-452-3p
	hsa-miR-590-3p	hsa-miR-454-3p
	hsa-miR-7-5p	hsa-miR-455-3p
	hsa-miR-1246	hsa-miR-4676-3p
	hsa-miR-1271-3p	hsa-miR-4735-5p
	hsa-miR-136-5p	hsa-miR-4782-5p
	hsa-miR-15b-3p	hsa-miR-485-3p
	hsa-miR-185-5p	hsa-miR-491-3p
	hsa-miR-217	hsa-miR-493-5p
	hsa-miR-301a-3p	hsa-miR-5195-3p
	hsa-miR-30b-3p	hsa-miR-532-3p
	hsa-miR-3200-5p	hsa-miR-582-3p
	hsa-miR-32-3p	hsa-miR-655-3p
	hsa-miR-346	hsa-miR-665
	hsa-miR-34c-5p	hsa-miR-668-3p
	hsa-miR-488-3p	hsa-mir-6807
	hsa-miR-500a-5p	hsa-miR-6884-5p
	hsa-miR-509-3-5p	hsa-miR-758-3p
	hsa-miR-561-5p	hsa-miR-876-5p
	hsa-miR-885-5p	hsa-miR-892c-3p
	hsa-miR-92a-3p	hsa-mir-98
	hsa-miR-940	hsa-miR-1224-3p
	hsa-miR-101-3p	hsa-mir-125a-3p
	hsa-miR-130a-3p	hsa-miR-125b-5p
	hsa-miR-142-5p	hsa-miR-1271-3p
	hsa-miR-145-3p	hsa-miR-129-5p
	hsa-miR-17-3p	hsa-miR-1298-5p
	hsa-miR-1915-3p	hsa-miR-138-2-3p
	hsa-miR-221-5p	hsa-miR-139-3p
	hsa-miR-26b-5p	hsa-miR-144-3p
	hsa-miR-335-5p	hsa-mir-148a
	hsa-miR-4487	hsa-mir-148b
	hsa-miR-449b-5p	hsa-miR-152
	hsa-miR-499a-3p	hsa-mir-153
	hsa-miR-5100	hsa-miR-154-3p
	hsa-miR-539-3p	hsa-miR-155-3p
	hsa-miR-641	hsa-miR-182-3p
	hsa-miR-137	hsa-mir-193a-3p/193b
	hsa-miR-138-5p	hsa-miR-199a-5p
	hsa-miR-222-3p	hsa-miR-199b-5p
	hsa-miR-2355-3p	hsa-mir-19a/19b
	hsa-miR-2681-5p	hsa-mir-19b-1-5p
	hsa-miR-302a-5p	hsa-mir-206
	hsa-miR-34a-5p	hsa-miR-208a-3p
	hsa-miR-361-5p	hsa-miR-208b-3p
	hsa-miR-3685	hsa-mir-210
	hsa-miR-376a-3p	hsa-miR-212-5p
	hsa-miR-4328	hsa-miR-214-5p
	hsa-miR-449c-5p	hsa-mir-216b
	hsa-miR-4803	hsa-mir-223-3p
	hsa-miR-522-3p	hsa-miR-22-3p
	hsa-miR-607	hsa-miR-224-5p
	hsa-miR-642b-5p	hsa-mir-24-1
	hsa-miR-708-5p	hsa-mir-27a/27b
	hsa-miR-135a-5p	hsa-mir-27b-3p
	hsa-miR-143-3p	hsa-mir-28-3p
	hsa-miR-181a-5p	hsa-miR-300
	hsa-miR-204-3p	hsa-miR-3129-5p
	hsa-miR-205-5p	hsa-miR-3139
	hsa-miR-21-5p	hsa-mir-32
	hsa-miR-2355-5p	hsa-miR-338-3p
	hsa-miR-3607-5p	hsa-miR-33a-3p
	hsa-miR-3611	hsa-miR-33b-3p
	hsa-miR-3689b-5p	hsa-mir-34a-3p
	hsa-miR-379-3p	hsa-miR-3529-5p
	hsa-miR-411-3p	hsa-miR-362-5p
	hsa-miR-488-5p	hsa-miR-363-5p
	hsa-miR-541-3p	hsa-miR-365a-3p
	hsa-miR-550a-3-5p	hsa-miR-365b-3p
	hsa-miR-873-5p	hsa-miR-371a-3p
	hsa-miR-18a-5p	hsa-miR-376a-3p
		hsa-miR-376b-3p
		hsa-miR-376c-3p
		hsa-miR-378a-5p
		hsa-miR-378b
		hsa-miR-378d
		hsa-miR-378e
		hsa-miR-378h
		hsa-miR-378i
		hsa-miR-379-3p
		hsa-miR-381-3p
		hsa-miR-409-5p
		hsa-miR-422a
		hsa-miR-4319
		hsa-miR-449a
		hsa-miR-486-3p
		hsa-miR-487a
		hsa-miR-487b-3p
		hsa-mir-488-3p
		hsa-miR-490-3p
		hsa-mir-494-3p
		hsa-miR-499a-3p
		hsa-miR-500b
		hsa-miR-542-3p
		hsa-miR-543
		hsa-miR-613
		hsa-miR-6893-3p
		hsa-miR-708-3p
		hsa-miR-7-2-3p
		hsa-miR-877-3p
		hsa-mir-92a-1-5p
		hsa-miR-92b-3p
		hsa-miR-9-5p
		hsa-miR-96-5p
